# Supplementary material for: Mechanism of Zn2+ and Ca2+ Binding to Human S100A1
Source: MDPI journal article supplement (doi:10.3390/biom11121823), 2021-12-03
Supplement: s1 [file s1]

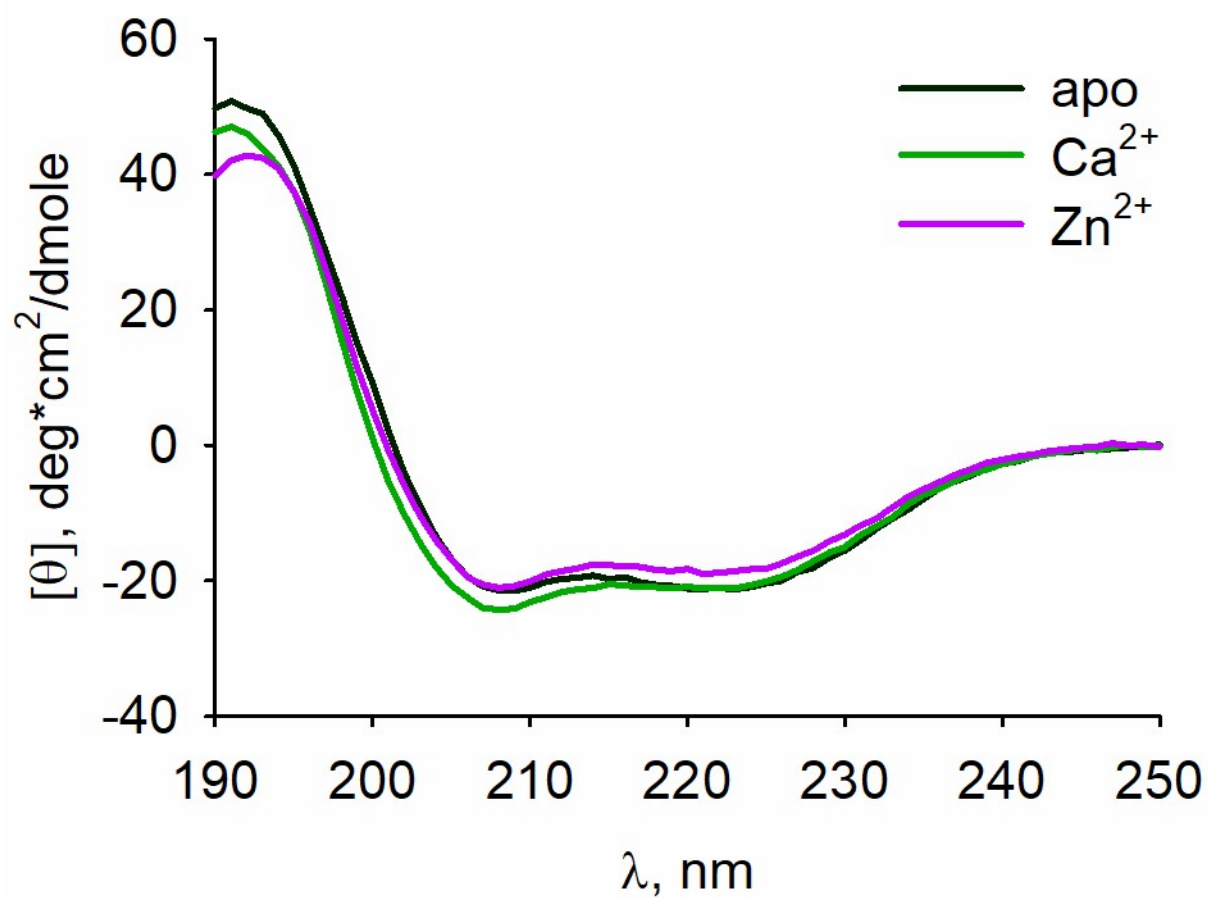

**Figure S1.** Far-UV CD spectra of 37  $\mu\text{M}$  apo (black line),  $\text{Ca}^{2+}$ -loaded (1 mM  $\text{CaCl}_2$ , solid green line) and  $\text{Zn}^{2+}$ -loaded (1 mM  $\text{ZnCl}_2$ , solid purple line) S100A1 at 37  $^\circ\text{C}$ .

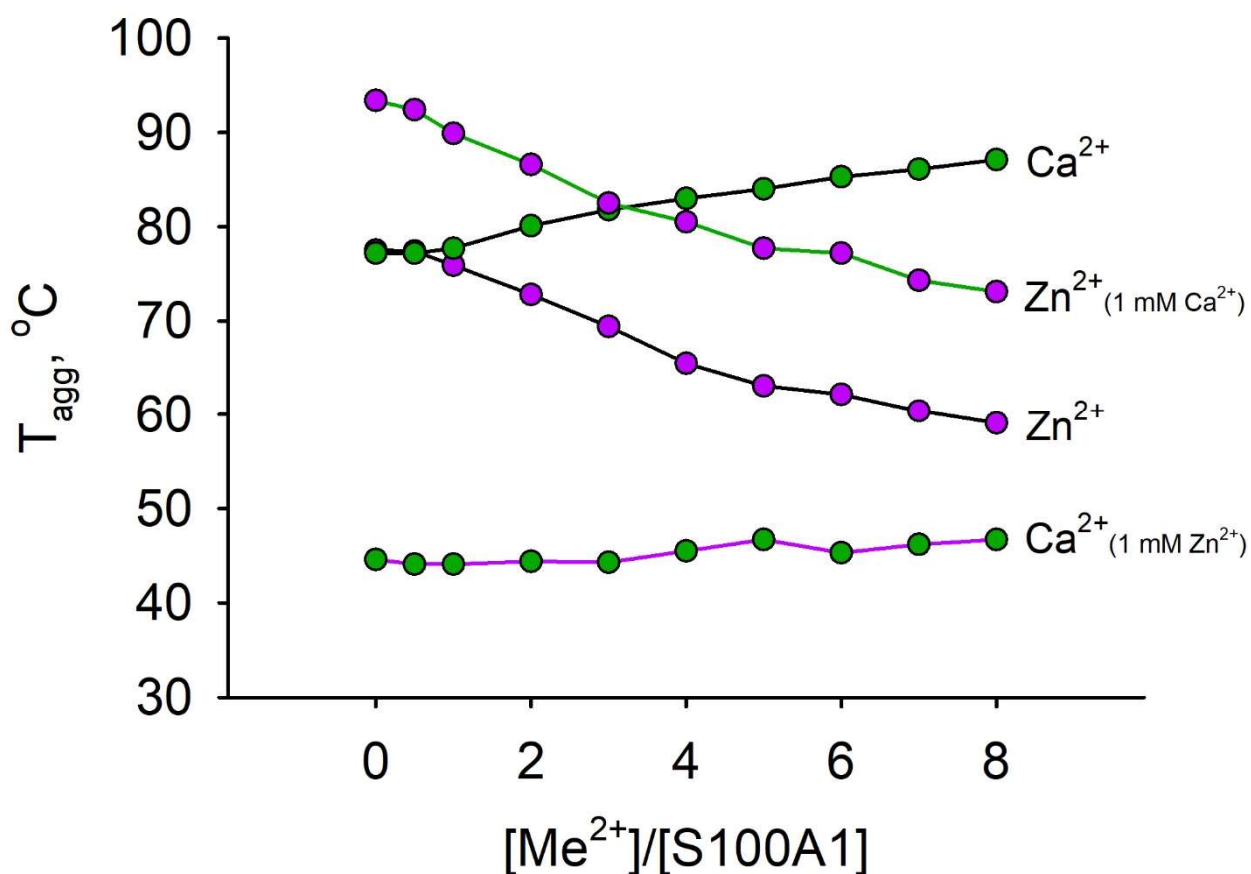

**Figure S2.** Effect of Ca<sup>2+</sup> and Zn<sup>2+</sup> on aggregation of S100A1. 37  $\mu$ M of S100A1 in a buffer containing Ca<sup>2+</sup>, or Zn<sup>2+</sup>, or their combinations was loaded into capillaries and light scattering at 350 nm was monitored at temperature range 20–110 °C. Aggregation temperatures ( $T_{agg}$ ) for S100A1 in presence of different ions were determined from the first derivative of light scattering temperature dependence.
